# Supplementary material
Source: publisher figshare collection journal article supplement (https://tandf.figshare.com/ndownloader/files/14504903)
Supplement: Supplementary file 1 [file 14504903]

**Table A1.** *Sample characteristics (weighted percentages)*

|                                     | Before retail sales<br>(June 2014) | After retail sales<br>(Nov–Dec 2014) | After retail sales<br>(June 2015) |
|-------------------------------------|------------------------------------|--------------------------------------|-----------------------------------|
| Age                                 | N=893                              | N=658                                | N=804                             |
| 16–20                               | 5                                  | 5                                    | 6                                 |
| 21–34                               | 23                                 | 27                                   | 24                                |
| 35–44                               | 17                                 | 22                                   | 20                                |
| 45–64                               | 37                                 | 31                                   | 35                                |
| 65 and older                        | 18                                 | 16                                   | 15                                |
| Unknown                             | 0                                  | <1                                   | 0                                 |
| Sex                                 |                                    |                                      |                                   |
| Male                                | 54                                 | 53                                   | 52                                |
| Female                              | 46                                 | 46                                   | 48                                |
| Unknown                             | <1                                 | <1                                   | <1                                |
| Race                                |                                    |                                      |                                   |
| White                               | 72                                 | 70                                   | 73                                |
| Black                               | 7                                  | 11                                   | 10                                |
| Native American or Alaska Native    | 5                                  | 5                                    | 2                                 |
| Asian                               | 2                                  | 3                                    | 1                                 |
| Native Hawaiian or Pacific Islander | 1                                  | 1                                    | 3                                 |
| Other or more than one              | 4                                  | 2                                    | 4                                 |
| Unknown                             | 8                                  | 9                                    | 7                                 |
| Ethnicity                           |                                    |                                      |                                   |
| Hispanic                            | 13                                 | 14                                   | 13                                |
| Non-Hispanic                        | 87                                 | 86                                   | 86                                |
| Unknown                             | <1                                 | 1                                    | <1                                |
| Education level                     |                                    |                                      |                                   |
| High school or less                 | 27                                 | 35                                   | 63                                |
| College degree or some college      | 64                                 | 59                                   | 35                                |
| Professional or graduate school     | 8                                  | 6                                    | 2                                 |
| Unknown                             | <1                                 | 0                                    | 0                                 |
| Household income                    |                                    |                                      |                                   |
| \$25,000 or less                    | 33                                 | 31                                   | 27                                |
| \$25,001–50,000                     | 9                                  | 10                                   | 35                                |
| \$50,001–75,000                     | 31                                 | 32                                   | 15                                |
| \$75,001–100,000                    | 17                                 | 18                                   | 0                                 |
| >\$100,000                          | 8                                  | 8                                    | 9                                 |
| Unknown                             | 1                                  | 2                                    | 15                                |

*Note.* Percentages do not always sum to 100% due to rounding.

**Table A2.** Drivers' responses to marijuana questionnaire, before and after retail sales of marijuana were implemented

|                                                                                                            | Before retail sales (June 2014) |          | After retail sales (Nov–Dec 2014) |          | After retail sales (June 2015) |          |
|------------------------------------------------------------------------------------------------------------|---------------------------------|----------|-----------------------------------|----------|--------------------------------|----------|
|                                                                                                            | Percent                         | 95% CI   | Percent                           | 95% CI   | Percent                        | 95% CI   |
| Ever used marijuana                                                                                        | N=893                           |          | N=658                             |          | N=804                          |          |
| Yes                                                                                                        | 66                              | [61, 71] | 68                                | [64, 73] | 67                             | [62, 72] |
| No                                                                                                         | 33                              | [28, 38] | 31                                | [27, 36] | 32                             | [27, 37] |
| Unknown                                                                                                    | 1                               | [0, 2]   | 1                                 | [0, 1]   | 1                              | [0, 2]   |
| (If ever used marijuana) Age at first use                                                                  | N=603                           |          | N=458                             |          | N=536                          |          |
| 12 and younger                                                                                             | 7                               | [4, 10]  | 8                                 | [5, 10]  | 7                              | [5, 9]   |
| 12–15                                                                                                      | 28                              | [23, 32] | 25                                | [20, 29] | 22                             | [17, 26] |
| 16–20                                                                                                      | 43                              | [37, 49] | 46                                | [41, 52] | 51                             | [45, 57] |
| 21–29                                                                                                      | 18                              | [13, 24] | 13                                | [8, 17]  | 14                             | [8, 19]  |
| 30 and older                                                                                               | 4                               | [2, 6]   | 9                                 | [4, 13]  | 7                              | [3, 11]  |
| Self-reported last marijuana use*                                                                          | N=893                           |          | N=658                             |          | N=804                          |          |
| Past 3 hours                                                                                               | 3                               | [2, 5]   | 3                                 | [2, 5]   | 4                              | [2, 6]   |
| Past 24 hours                                                                                              | 10                              | [6, 14]  | 10                                | [7, 12]  | 9                              | [6, 12]  |
| Past week                                                                                                  | 15                              | [11, 20] | 17                                | [14, 20] | 18                             | [13, 22] |
| Past month                                                                                                 | 21                              | [16, 25] | 23                                | [19, 26] | 22                             | [18, 27] |
| Past year                                                                                                  | 29                              | [24, 34] | 30                                | [26, 34] | 26                             | [22, 31] |
| >1 year ago or never                                                                                       | 69                              | [65, 74] | 67                                | [63, 72] | 70                             | [66, 75] |
| Unknown                                                                                                    | 2                               | [1, 3]   | 3                                 | [1, 5]   | 3                              | [1, 6]   |
| (If used marijuana in past year) Frequency of use                                                          | N=305                           |          | N=250                             |          | N=269                          |          |
| Daily                                                                                                      | 14                              | [8, 20]  | 19                                | [13, 25] | 17                             | [11, 24] |
| 5 or more times a week                                                                                     | 11                              | [2, 21]  | 5                                 | [2, 7]   | 7                              | [3, 11]  |
| 3–4 times a week                                                                                           | 11                              | [5, 18]  | 7                                 | [3, 11]  | 5                              | [2, 8]   |
| 2 or less times a week                                                                                     | 6                               | [3, 9]   | 12                                | [7, 16]  | 12                             | [3, 20]  |
| 4 times or less a month                                                                                    | 9                               | [4, 13]  | 7                                 | [3, 11]  | 17                             | [9, 26]  |
| 12 times or less a year                                                                                    | 19                              | [13, 26] | 18                                | [12, 24] | 19                             | [12, 27] |
| Once year or less                                                                                          | 26                              | [19, 34] | 24                                | [18, 30] | 16                             | [11, 22] |
| Unknown                                                                                                    | 3                               | [1, 6]   | 8                                 | [2, 14]  | 6                              | [0, 12]  |
| (If ever used marijuana) Where the driver usually gets it                                                  | N=614                           |          | N=466                             |          | N=550                          |          |
| Friend/acquaintance                                                                                        | 59                              | [53, 64] | 54                                | [48, 60] | 44                             | [38, 50] |
| Licensed distributor/retailer                                                                              | 8                               | [5, 12]  | 11                                | [8, 14]  | 20                             | [15, 25] |
| Other or unknown                                                                                           | 33                              | [27, 39] | 35                                | [30, 41] | 36                             | [30, 42] |
| (If ever used marijuana) Last place of use                                                                 |                                 |          |                                   |          |                                |          |
| Home                                                                                                       | 37                              | [31, 43] | 37                                | [31, 42] | 41                             | [35, 47] |
| Friend's home                                                                                              | 28                              | [23, 33] | 31                                | [26, 36] | 24                             | [19, 29] |
| Other or unknown                                                                                           | 35                              | [29, 41] | 32                                | [27, 37] | 35                             | [29, 41] |
| (If used marijuana more than once in past year) Used it within 2 hours before driving                      | N=224                           |          | N=185                             |          | N=207                          |          |
| Yes                                                                                                        | 42                              | [31, 52] | 30                                | [22, 37] | 44                             | [32, 55] |
| No                                                                                                         | 57                              | [46, 68] | 62                                | [53, 71] | 49                             | [38, 60] |
| Unknown                                                                                                    | 1                               | [0, 3]   | 9                                 | [1, 16]  | 7                              | [0, 15]  |
| (If used marijuana before driving) How did the driver think it affected their driving?                     | N=97                            |          | N=66                              |          | N=79                           |          |
| Made driving worse                                                                                         | 2                               | [0, 5]   | 4                                 | [0, 9]   | 10                             | [3, 18]  |
| Made driving better                                                                                        | 21                              | [9, 33]  | 23                                | [11, 36] | 14                             | [1, 27]  |
| Did not make a difference                                                                                  | 61                              | [46, 76] | 55                                | [41, 70] | 72                             | [57, 88] |
| Do not know                                                                                                | 16                              | [2, 29]  | 17                                | [5, 30]  | 3                              | [0, 7]   |
| (If used marijuana more than once in past year) Ever NOT driven due to marijuana use                       | N=224                           |          | N=185                             |          | N=207                          |          |
| Yes                                                                                                        | 57                              | [47, 68] | 48                                | [39, 58] | 67                             | [57, 77] |
| No                                                                                                         | 38                              | [27, 48] | 46                                | [37, 55] | 32                             | [22, 42] |
| Unknown                                                                                                    | 5                               | [0, 11]  | 9                                 | [1, 16]  | 1                              | [0, 3]   |
| Likelihood of marijuana impairing a person's ability to drive safely if used within 2 hours of driving     | N=892                           |          | N=658                             |          | N=803                          |          |
| Very likely                                                                                                | 51                              | [46, 56] | 49                                | [45, 54] | 49                             | [44, 54] |
| Likely                                                                                                     | 18                              | [14, 21] | 16                                | [12, 19] | 20                             | [16, 24] |
| Somewhat likely                                                                                            | 20                              | [16, 24] | 21                                | [18, 25] | 21                             | [17, 26] |
| Not at all likely                                                                                          | 10                              | [8, 13]  | 10                                | [8, 13]  | 8                              | [5, 11]  |
| Unknown                                                                                                    | 1                               | [0, 2]   | 3                                 | [1, 5]   | 1                              | [0, 3]   |
| Likelihood of a person being arrested for impaired driving after using marijuana within 2 hours of driving | N=891                           |          | N=658                             |          | N=803                          |          |
| Very likely                                                                                                | 39                              | [34, 44] | 39                                | [34, 44] | 41                             | [36, 46] |
| Likely                                                                                                     | 26                              | [21, 30] | 28                                | [23, 32] | 28                             | [23, 33] |
| Somewhat likely                                                                                            | 22                              | [18, 26] | 23                                | [19, 27] | 21                             | [16, 26] |
| Not at all likely                                                                                          | 12                              | [8, 16]  | 8                                 | [5, 10]  | 10                             | [7, 13]  |
| Unknown                                                                                                    | 1                               | [0, 3]   | 3                                 | [1, 5]   | 1                              | [0, 1]   |

Note. Percentages do not always sum to 100% due to rounding. All percentages are weighted. CI = confidence interval

\* Percentages sum to more than 100% due to some categories being cumulative (e.g., "past week" includes "past 24 hours")

**Table A3.** Drivers' marijuana and alcohol use and perceptions of risk, by driver age and sex (weighted percentages and 95% confidence intervals)

|                                                                                                           | Males ages 16–34     |                      |                      | Males 35 and older   |                      |                      | Females ages 16–34   |                      |                      | Females 35 and older |                      |                      |
|-----------------------------------------------------------------------------------------------------------|----------------------|----------------------|----------------------|----------------------|----------------------|----------------------|----------------------|----------------------|----------------------|----------------------|----------------------|----------------------|
|                                                                                                           | June<br>2014         | Nov–Dec<br>2014      | June<br>2015         |
| Self-reported last marijuana use*                                                                         | N=303                | N=231                | N=268                | N=240                | N=166                | N=207                | N=174                | N=136                | N=169                | N=173                | N=122                | N=157                |
| Past 24 hours                                                                                             | 14 [9, 19]           | 17 [12, 22]          | 13 [7, 19]           | 6 [3, 10]            | 10 [5, 15]           | 9 [3, 15]            | 12 [6, 18]           | 13 [7, 20]           | 18 [11, 25]          | 12 [2, 22]           | 4 [1, 7]             | 4 [1, 7]             |
| Past month                                                                                                | 30 [24, 37]          | 37 [30, 43]          | 30 [23, 37]          | 15 [10, 20]          | 17 [11, 23]          | 24 [16, 32]          | 35 [26, 44]          | 33 [24, 41]          | 33 [25, 42]          | 18 [8, 28]           | 16 [9, 24]           | 12 [4, 21]           |
| Past year                                                                                                 | 44 [37, 51]          | 44 [37, 51]          | 38 [31, 46]          | 23 [16, 30]          | 23 [16, 30]          | 26 [18, 35]          | 47 [38, 56]          | 52 [43, 61]          | 40 [32, 49]          | 23 [13, 33]          | 21 [13, 29]          | 15 [6, 23]           |
| Oral fluid/blood results                                                                                  | N=300                | N=226                | N=268                | N=237                | N=161                | N=207                | N=169                | N=134                | N=168                | N=171                | N=118                | N=156                |
| THC-positive                                                                                              | 16 [11, 21]          | 22 [16, 28]          | 27 [20, 34]          | 13 [8, 18]           | 19 [12, 26]          | 20 [12, 28]          | 16 [9, 23]           | 16 [9, 23]           | 21 [14, 27]          | 16 [8, 23]           | 25 [17, 34]          | 11 [3, 20]           |
| Breath results                                                                                            | N=301                | N=231                | N=262                | N=238                | N=165                | N=203                | N=173                | N=136                | N=168                | N=170                | N=121                | N=154                |
| Alcohol-positive                                                                                          | 10 [5, 14]           | 5 [2, 9]             | 5 [1, 9]             | 5 [1, 10]            | 2 [0, 3]             | 4 [0, 8]             | 4 [1, 7]             | 8 [2, 13]            | 3 [0, 6]             | 2 [0, 3]             | 1 [0, 2]             | 4 [0, 8]             |
| Oral fluid/blood and breath results                                                                       | N=298                | N=226                | N=262                | N=235                | N=160                | N=203                | N=168                | N=134                | N=167                | N=168                | N=117                | N=154                |
| THC- and alcohol-positive                                                                                 | 2 [0, 3]             | 1 [0, 2]             | 3 [0, 7]             | 1 [0, 3]             | 0 na                 | 1 [0, 2]             | 1 [0, 2]             | 1 [0, 2]             | 0 na                 | 1 [0, 2]             | 0 na                 | 0 na                 |
| Perceptions of risk                                                                                       |                      |                      |                      |                      |                      |                      |                      |                      |                      |                      |                      |                      |
| Marijuana very likely to impair driving if<br>used within 2 hours of driving                              | N=302<br>35 [30, 42] | N=231<br>37 [30, 44] | N=267<br>41 [33, 48] | N=240<br>48 [40, 56] | N=166<br>52 [43, 60] | N=207<br>46 [37, 55] | N=174<br>36 [28, 44] | N=136<br>40 [31, 48] | N=169<br>43 [34, 52] | N=173<br>67 [56, 77] | N=122<br>58 [48, 68] | N=157<br>59 [48, 70] |
| Drivers very likely to be arrested for<br>impaired driving if marijuana used<br>within 2 hours of driving | N=302<br>35 [28, 41] | N=231<br>38 [31, 44] | N=267<br>35 [28, 42] | N=239<br>36 [29, 43] | N=166<br>38 [30, 46] | N=207<br>36 [28, 45] | N=174<br>38 [30, 46] | N=136<br>32 [24, 40] | N=169<br>42 [33, 50] | N=173<br>45 [34, 56] | N=122<br>44 [34, 54] | N=157<br>48 [37, 59] |

Note. na = not applicable. THC-positive is defined as a positive test for THC and/or the active metabolite hydroxy -THC in blood and/or oral fluid.

\* Percentages sum to more than 100% due to some categories being cumulative (e.g., “past week” includes “past 24 hours”)
